1 **A new animal model signifying a decisive bridge between innate immunity and the**  
2 **pathognomonic morphological characteristics of Type 1 Diabetes.**

3

4

5

6

7 Tegehall Angie<sup>1\*</sup>, Ingvast Sofie<sup>1</sup>, Melhus Åsa<sup>2</sup>, Skog Oskar<sup>1</sup> and Korsgren Olle<sup>1\*</sup>

8 <sup>1</sup> Department of Immunology, Genetics and pathology, Rudbeck Laboratory, Uppsala

9 University, 751 85 Uppsala, Sweden

10 <sup>2</sup> Department of Medical Sciences, Section of Clinical Microbiology, Uppsala University,

11 Uppsala, Sweden

12 Number of words: 3264

13 Number of tables: 1

14 Number of figures: 3

15

16 \*Corresponding author:

17 Olle Korsgren, Ph.D., M.D.

18 Department of Immunology, Genetics and Pathology, Uppsala University, SE-751 85

19 Uppsala, Sweden. Phone: +46 611 0000, fax: +46 611 0222 E-mail: [olle.korsgren@igp.uu.se](mailto:olle.korsgren@igp.uu.se)

20 ORCID identifier: 0000-0002-8524-9547

21 **Summary Statement**

22 The results presented signify a previously unknown decisive bridge between innate immunity and  
23 formation of the pathognomonic immunopathological events described in subjects with recent onset  
24 T1D.

25

26 **Abstract**

27 Available animal models for Type 1 Diabetes (T1D) show limited similarities with the human  
28 disease and have no predictive value in screening for effective intervention therapies. Heat-  
29 inactivated bacteria instilled in the ductal compartment of the pancreas in healthy rats rapidly  
30 cause periductal inflammation and accumulation of mainly granulocytes and monocytes in the  
31 exocrine pancreas and in the peri-islet area mimicking the acute pancreatic inflammation in  
32 subjects with recent onset T1D. After three weeks, the triggered exocrine inflammation had  
33 vanished and pancreases showed normal morphology. However, a distinct accumulation of both  
34 CD4+ and CD8+ T cells within and adjacent to affected islets was found in one third of the rats,  
35 mimicking the pathognomonic insulinitis in T1D. As in human T1D, the insulinitis affected a  
36 fraction of all islets and was observed only in certain lobes of the pancreases. The presented  
37 animal model for T1D will allow detailed mechanistic studies to unravel a previously unknown  
38 interplay between bacteria-activated innate immunity and an acquired cellular immunity  
39 forming the immunopathological events described in humans at different stages of T1D.

## 40 **Introduction**

41 The autoimmune barrier in Type 1 Diabetes (T1D) is only vaguely understood. However, an  
42 immunopathological hallmark in the pancreas of patients with T1D is the accumulation of  
43 immune cells within and around affected islets, i.e., insulitis (Campbell-Thompson et al.,  
44 2016a, Reddy et al., 2015). Notably, only few T cells infiltrate the islets (In't Veld, 2014,  
45 Krogvold et al., 2016, Reddy et al., 2015). In fact, an extensive study using multiplex  
46 immunofluorescent staining of 35 simultaneous biomarkers with a spatial resolution of 1  $\mu\text{m}$   
47 demonstrated that immune and islet cells essentially remain isolated from each other even in  
48 patients with recent onset T1D (Damond et al., 2019). Phenotypically, CD8<sup>+</sup> and CD4<sup>+</sup> T cells  
49 dominate the insulitis, followed by monocytes/macrophages. B cells are less frequent, and  
50 regulatory T cells, NK cells and plasma cells are only rarely found (Willcox et al., 2009).  
51 Also, the exocrine pancreas is affected, as evidenced for example by a markedly smaller  
52 volume and presence of multifocal T-cell infiltrates in acinar regions.

53 The proportion of islets with insulitis has been inversely associated with disease duration in  
54 some (Campbell-Thompson et al., 2016a), but not other studies (Reddy et al., 2015). Insulitis  
55 seems not related to age at onset, number of autoantibodies, or HLA genotype (Campbell-  
56 Thompson et al., 2016a). The presence of remaining insulin-positive cells in islets with  
57 insulitis several years, or even decades, after diagnosis of T1D is intriguing and argue against  
58 a classical T-cell mediated cytotoxic elimination of the insulin-producing cells. On the  
59 contrary, our current knowledge of T1D suggests a mild and slowly progressing disease.

60 A substantial proportion the CD8<sup>+</sup> T cells in the insulitic lesions from subjects with  
61 recent onset T1D constitute tissue resident memory T cells (T<sub>RM</sub> cells) (Kuric et al., 2017).  
62 T<sub>RM</sub> cells were present in all T1D subjects examined and represented about 40% of the total  
63 number of CD8<sup>+</sup> T cells per inflamed islet, a proportion of T<sub>RM</sub> cells similar to that  
64 previously described in skin lesions of psoriasis (Cheuk et al., 2014). Also, T and B cell  
65 gene expression pattern in infiltrated islets argue against that the T cells found in the  
66 insulitic lesions constitute conventional cytotoxic T CD8<sup>+</sup> cells (Krogvold et al., 2016).  
67 T<sub>RM</sub> cells constitute a subset of memory T cells that persist for years at the site of a  
68 previous infection without persistence of antigen stimulation and provide rapid immune  
69 protection against re-infection via the same entry port (Clark, 2015). The substantial  
70 proportion of T<sub>RM</sub> cells in islets of recent onset T1D subjects support the hypothesis of  
71 infectious agents in the development of T1D (Skog et al., 2013).

72 Progress in medical research often depend on the availability of validated small animal models,  
73 especially so in disease-oriented research aiming to develop effective intervention therapies,  
74 including T1D. Lack of predictive and validated animal models has indeed caused the  
75 pharmaceutical industry to abandon entire disease areas (Pound, 2020).

76 The most common animal models in T1D research are the NOD mouse and the BB rat.  
77 Unfortunately, both models show limited similarities with human T1D and have little predictive  
78 value in screening for effective intervention therapies (Roep and Atkinson, 2004). Major  
79 dissimilarities between these animal models and human T1D include 1) the general  
80 dysregulation of their immune system causing disease progression in several organs besides the  
81 pancreas, 2) the gender and strain-dependency, 3) the dependency of specific husbandry  
82 conditions, and 4) major histopathologic differences in morphology and immune mediated  
83 destruction of the beta cells when compared to that in humans.

84 The hallmark of T1D is a slowly (years) progressing decline in endogenous insulin secretion  
85 resulting in an increased blood glucose. In the search for an animal model for T1D, high blood  
86 glucose has often been the primary criterion. However, rodents, in contrast to humans, have a  
87 remarkable capacity to regenerate both the exocrine and endocrine pancreas, e.g. three weeks  
88 after 90% pancreatectomy in the rat both the exocrine and endocrine volumes are almost  
89 restored (Brockenbrough et al., 1988). This difference in regenerative capacity should be  
90 considered together with the remitting and relapsing disease process over many years and the  
91 patchy distribution of affected areas of the pancreas in humans affected by T1D (Gepts, 1965),  
92 i.e. at each point of time, some lobes of the pancreas are affected whereas others remain  
93 apparently intact. This patchy affection of the pancreas is one of the most characteristic  
94 immunopathological findings in T1D and shows resemblances with several other immune  
95 mediated diseases, including psoriasis, alopecia and multiple sclerosis. A remitting/relapsing  
96 and patchy disease process in a species with significant regenerative capacity would trigger a  
97 compensatory formation of new islets from unaffected areas of the pancreas thereby preventing  
98 development of hyperglycemia. In fact, in NOD mice or BB rats all beta cells in the entire  
99 pancreas are destroyed over a short period of time, an immune-process vastly different from  
100 that in human T1D (Alanentalo et al., 2010). Therefore, we should refrain from including overt  
101 diabetes as the main criterion for clinically relevant rodent models of T1D.

102 We have previously reported that injection of heat-inactivated human pathogens in the ductal  
103 compartment of the pancreas in healthy rats of several different strains causes periductal  
104 inflammation and accumulation of immune cells, mainly granulocytes and monocytes, in  
105 certain lobes of the exocrine pancreas and in the peri-islet area (Korsgren et al., 2012). Small

106 bleedings or large dilatations of the capillaries were frequently found within the islets and  
107 several beta cells showed severe hydropic degeneration, i.e., swollen cytoplasm, but with  
108 preserved nuclei. These findings show marked similarities with those observed in the  
109 pancreases of patients dying at onset of T1D. However, inflammation of the pancreas in humans  
110 examined weeks or months after diagnosis of T1D is substantially reduced and mainly consists  
111 of discreet insulitis, mainly consisting of T cells, in only few islets (Campbell-Thompson et al.,  
112 2013, Krogvold et al., 2016).

113 The present investigation was undertaken in order to study how the acute inflammation  
114 triggered by instillation of heat-inactivated bacteria in the ductal compartment develops over a  
115 period of several weeks in the rat and how observed findings relate to T1D in humans with an  
116 aim to further validate the model for T1D research.

## 117 RESULTS

118

### 119 *Bacterial Challenge and Animal Well-being*

120 All animals tolerated the surgical procedure well. No macroscopic changes were observed in  
121 any abdominal organ after 3 or 6 weeks after the bacterial challenge. IVGTT revealed no  
122 significant differences in peak glucose values and subsequent glucose disposal 3 or 6 weeks  
123 after the bacterial challenge when compared with control rats ( $p>0.05$ , Fig. 1).

### 124 *Early Innate Antibacterial Responses*

125 Pancreatic sections from a human organ donor with acute onset T1D showed a >2-fold  
126 overexpression of 18 antibacterial genes compared to non-diabetic donors ( $P<0.05$ ,  $fdr<10\%$ )  
127 (Fig. 2A). Bacterial translocation in the rat induced after 4 h a >2-fold overexpression of 22  
128 genes and underexpression of one gene (*ccl5/rantes*) related to antibacterial response ( $P<0.05$ ,  
129  $fdr<10\%$ ) (Fig. 2B). Eight of these were homologues to genes that were significantly  
130 induced by bacterial translocation in the human.

131

### 132 *Immune-cell Infiltration and Insulinitis*

133

#### 134 *A human organ donor that died at onset of type 1 diabetes*

135 A detailed morphological description of the inflammation in the pancreas of the 29-year-old  
136 organ donor that died at onset of T1D has been reported previously (Korsgren et al., 2012).  
137 This donor fulfilled the consensus definition of insulinitis (Campbell-Thompson et al., 2013)  
138 and clusters of immune cells were frequently observed close to the islets (insulinitis) (Fig. 3A).  
139 Immunohistochemical staining for CD3 revealed that most cells in the insulinitis were T cells.  
140 Of these, a majority was CD8<sup>+</sup>, but several CD4<sup>+</sup> cells were also observed (Korsgren et al.,  
141 2012).

#### 142 *Rats three weeks after bacterial challenge*

143 The general pancreatic inflammation seen in rats acutely after bacteria translocation was not  
144 different when compared to our previous report (Korsgren et al., 2012). This acute  
145 inflammation in response to the bacterial challenge was no longer observed three weeks after  
146 translocation. Seven of the eight control animals had normal pancreatic architecture with  
147 presence of only occasional immune cells. However, some of the rats showed increased  
148 occurrence of fibrosis in the head of the pancreas and one control animal had signs of a small

149 bleeding in the head region of the pancreas with presence of small numbers of CD68+,  
150 CD20+, CD3+ and CD4+ and CD3 and CD4+ immune cells. The pancreatic tail region of this  
151 animal had very few immune cells and no signs of bleedings.

152 Five of the eight animals treated with ductal instillation of a bacterial mixture showed normal  
153 pancreatic architecture with presence of only occasional immune cells. However, in three of  
154 the rats injected with *E. faecalis*, some pancreatic lobes in both the head and tail regions  
155 contained occasional focal areas of dense accumulations of immune cells (Fig. 3B),  
156 resembling the organization of lymphatic tissue with presence of large numbers of T cells  
157 (CD3+, CD8+ and CD4+) and B cells (CD20+). These areas of dense lymphatic tissues  
158 seemed randomly distributed in the exocrine pancreas.

159 The most noticeable finding in these three rats was presence of insulitis in some lobes of both  
160 the head and tail regions of the pancreases. In the affected regions, 20-80% of islets showed  
161 insulitis (Fig. 3C-L). Islet architecture remained normal with presence of insulin-positive cells  
162 preferentially in the center and glucagon-positive cells preferentially in the periphery of the  
163 islets (Fig 3C-D). Phenotypically, a majority of the immune cells in the insulitic lesions were  
164 T cells (CD3<sup>+</sup>) (Fig. 3E-F), but also B cells (CD20<sup>+</sup>) (Fig. 3G) and macrophages (CD68<sup>+</sup>)  
165 (Fig. 3H) were common. Both CD8<sup>+</sup> and CD4<sup>+</sup> cells were frequent among the T cells in the  
166 insulitic lesions (Fig. 3I-J) and many displayed the tissue residence marker CD103 (Fig. 3K-  
167 L).

168 *Rats six weeks after bacterial challenge.*

169 All animals had normal pancreatic architecture with presence of only occasional immune  
170 cells. No rat showed insulitis. However, half of the rats challenged with heat-inactivated  
171 bacteria in the ductal system showed increased occurrence of fibrosis in the head of the  
172 pancreas.

173

174

175

176

## 177 **DISCUSSION**

178 In the present study, a new rat model in T1D was validated against the classical  
179 morphological hallmarks of human T1D. The intense cellular innate inflammation triggered  
180 acutely after instillation of heat-inactivated bacteria in the ductal compartment (Korsgren et  
181 al., 2012) was seemingly resolved after 3 weeks. However, in about one third of the animals  
182 examined after 3 weeks, a distinct accumulation of both CD4<sup>+</sup> and CD8<sup>+</sup> T cells was found  
183 within and adjacent to some of the islets, fulfilling the consensus definition of insulitis in  
184 humans (Campbell-Thompson et al., 2013). As in humans with recent onset T1D, the insulitis  
185 affected a minority of islets and was observed only in certain lobes of the pancreases  
186 examined.

187 No deterioration of glucose metabolism was found in rats subjected to an IVGTT. At first  
188 this may seem disappointing, however, a rodent model mimicking human T1D should in the  
189 initial disease process affect only some islets. It could be speculated that at least two  
190 additional circumstances are required for hyperglycemia to develop; 1) repeated lesions that  
191 over time that would gradually affect increasingly larger volumes of the pancreas and 2) a  
192 species unable to regenerate the pancreas between each insult. Rodents able to restore both  
193 endocrine and exocrine pancreas in just a few weeks (Brockenbrough et al., 1988) are  
194 therefore not suitable for studying the effects on long-term glucose metabolism. It is also  
195 plausible that an animal less resilient to bacterial challenges than the rat, e.g., humans, would  
196 show more negative effects on their glucose metabolism.

197 Instillation of heat-inactivated bacteria induced a self-resolving short-term patchy innate  
198 inflammation in the rat. However, about one third of the rats showed induction of acquired  
199 immunity as evidenced by persistent insulitis consisting mainly of CD8<sup>+</sup> T cells. This type of  
200 insulitis is seemingly identical to that found in human subjects examined a few weeks after  
201 diagnosis of T1D, e.g. in the DiViD biopsy study (Krogvold et al., 2016, Kuric et al., 2017).  
202 Notably, a fraction of the T cells found in the insulitic lesions in the rats expressed the CD103  
203 antigen. The precise role of CD103 on T cells is not fully understood. However, it has been  
204 suggested that CD103 is important for conjugation of CD8<sup>+</sup> T cell to E-cadherin-expressing  
205 epithelial cells, thereby facilitating their destruction upon virus and bacterial infections  
206 (Clark, 2015). Recently, we reported on the presence of significant number of tissue resident  
207 memory T cells (CD8<sup>+</sup>, CD69<sup>+</sup>, CD103<sup>+</sup>) in the insulitic lesions in humans with recent onset  
208 T1D (Kuric et al., 2017) similar to the herein reported expression of CD103 on T cells in the  
209 insulitis in rats after bacterial instillation. Notably, also the areas of dense lymphatic tissues,  
210 seemingly randomly distributed in the exocrine pancreas in the rat model mimic the



211 compartmentalized tertiary lymphoid organs recently reported in human subjects with short  
212 T1D disease duration (Smeets et al., 2021, Korpos et al., 2021).

213 Importantly, half of the rats examined 6 weeks after installation of heat-inactivated  
214 bacteria in the ductal compartment showed increased fibrosis in some lobes of the exocrine  
215 pancreas. The involvement of the exocrine pancreas in patients with T1D is  
216 underappreciated; several studies have reported the appearance of autoantibodies against  
217 exocrine cells prior to the onset of T1D (Hardt et al., 2008, Panicot et al., 1999, Taniguchi  
218 et al., 2001, Taniguchi et al., 2003), with high predictive value for the future development  
219 of T1D. Focal lesions of acute pancreatitis and an accumulation of leukocytes, often around  
220 the ducts, has frequently been reported in a majority of subjects with recent-onset (T1D)  
221 (Gepts, 1965, Foulis et al., 1986), and most T1D patients display extensive periductal and  
222 interlobular fibrosis, i.e., the end stage of inflammation (Meier et al., 2005). Also, a  
223 substantial reduction ( $\approx 30\%$ ) in pancreatic volume is present in newly diagnosed subjects  
224 (Gaglia et al., 2011, Williams et al., 2007, Williams et al., 2012), as well as mild-to-  
225 moderate exocrine pancreatic insufficiency (Creutzfeldt et al., 2005). Reduced pancreatic  
226 weight has also been demonstrated in pancreases from organ donors with “pre-diabetes”  
227 (presence of islet auto-antibodies) (Campbell-Thompson et al., 2016b, Campbell-Thompson  
228 et al., 2012).

229 A role for bacteria in the development of T1D is emerging (Korsgren et al., 2012, Rouxel et  
230 al., 2017, Knip and Siljander, 2016, Abdellatif et al., 2019). Notably, both the type and the  
231 intensity of the proinflammatory responses induced in isolated human islets depend on the  
232 specific strain of bacteria applied (Korsgren et al., 2012, Abdellatif et al., 2019). Although the  
233 present study includes only a few bacterial species, only rats instilled with a bacterial  
234 challenge including heat-inactivated *E. faecalis* developed the morphological characteristics  
235 of T1D. Expression of genes related to anti-bacterial response was upregulated in the pancreas  
236 of the subject with recent onset T1D as well as in rats exposed to heat-inactivated bacteria  
237 relative to that observed in controls (Fig 2). It is therefore postulated that the observed  
238 findings result as an interplay between an external inflammatory trigger (the heat-inactivated  
239 bacteria) and a proinflammatory response induced in affected islets (release of cytokines and  
240 chemokines).

241 Trafficking and activation of leukocytes is controlled by chemokines and cytokines  
242 produced by parenchymal cells in response to inflammation. The HLA genotypes conferring  
243 an increased risk for T1D are linked to increased innate responses to bacterial infections  
244 (Kotb et al., 2002) further underlying the importance of the interplay between innate and

245 acquired immune responses in T1D. Several proteins with this powerful immunoregulatory  
246 capacity are produced by human islet cells, e.g. CCL2 (MCP-1), CCL5 (RANTES), CCL3  
247 (macrophage inflammatory protein 1-alpha (MIP-1-alpha)), CXCL2 (MIP-2), CXCL9  
248 (monokine induced by gamma interferon (MIG)), CXCL10 (Interferon gamma-induced  
249 protein 10 (IP-10)), CXCL11 (Interferon-inducible T-cell alpha chemoattractant (I-TAC)),  
250 Macrophage migration inhibitory factor (MIF), IL-1 $\beta$ , IL-6 and IL-8 (Waeber et al., 1997,  
251 Johansson et al., 2003, Eizirik et al., 2012). This cascade of cytokines and chemokines  
252 released by islet cells in response to inflammation can supposedly explain the constant and  
253 puzzling finding, observed already after a few hours, with accumulation of large number of  
254 granulocytes and monocytes in the peri-islet area also in lobes not, or only marginally,  
255 affected by the inflammation in the exocrine pancreas (Korsgren et al., 2012). At later stages  
256 this initial innate islet inflammation is replaced by T and B lymphocytes to form the  
257 archetypical insulinitis observed in subjects with recent onset T1D (Gepts, 1965). This interplay  
258 between the islets and the immune system is illustrated by the distinct insulinitis affecting a  
259 substantial number of islets also in the splenic part of the pancreas, i.e., parts of the pancreas  
260 most distal from the intestine and the injection site of the heat-inactivated bacteria.

261 Whenever repeated, similar processes would be initiated in additional lobes of the pancreas  
262 eventually affecting large volumes of the pancreas. Notably, repeated pancreatic inflammation  
263 would likely induce activation of the CD103<sup>+</sup> T cells residing in the previously formed  
264 insulitic lesions resulting in cytolysis until the total number of beta cells is too low to maintain  
265 glucose metabolism. Tentatively, the progression to diabetes is facilitated by the observed  
266 periductal fibrosis, the end-stage of periductal inflammation found both in the herein  
267 described rat model and in human T1D (Gepts, 1965, Meier et al., 2005), negatively affecting  
268 the formation of new islets (Butler et al., 2003, Skog and Korsgren, 2020).

269 In summary, we present a novel rodent model for the early immunopathological events in  
270 T1D. With the data presented here, together with our previous publication (Korsgren et al.,  
271 2012), it is demonstrated that this model fulfills the following criteria of being relevant for  
272 human T1D: 1) no strain restriction, 2) similar affection of both male and female animals, 3)  
273 no dependency of husbandry conditions, 4) dependency on environmental trigger(s), 5)  
274 remitting and relapsing disease process, 6) patchy affection of the pancreas, 7) initial innate  
275 inflammation of some pancreatic lobes, and 8) subsequent formation of insulinitis, a  
276 pathognomonic morphological characteristics of T1D. The presented model allows detailed  
277 mechanistic studies to unravel the interplay between the innate and acquired immunity in the

278 formation of immunopathological events seemingly identical to those described in humans  
279 with recent onset T1D.

## 280 **Materials and Methods**

### 281 *Ethics*

282 All work involving human tissue was conducted according to principles expressed in the  
283 Declaration of Helsinki. The consent to use pancreatic tissue from deceased organ donors for  
284 research purposes was obtained verbally from the deceased person's next of kin by the  
285 physician in charge or obtained from an online database and fully documented in accordance  
286 with Swedish law and regional standard practices. The study was approved by the Regional  
287 Ethics Committee in Uppsala, Sweden (Dnr 2009/043, 2009/371, 2015/444). Animal  
288 experiments were approved by the Uppsala Laboratory Animal Ethical Committee (permit  
289 number C141/15), on the condition that only dead bacteria were used if the observation period  
290 was prolonged compared with the initial study (Korsgren et al., 2012).

### 291 *Human pancreatic samples*

292 Pancreatic tissue from a 29-year old organ donor that died at onset of T1D (a previously  
293 healthy man with B-glucose 46 mmol/L and ketoacidosis at arrival to the emergency room  
294 and with a BMI of 24.2 kg/m<sup>2</sup> and HbA1c 90 mmol/mol, previously described in detail  
295 (Korsgren et al., 2012) and two donors without diabetes (a 31 year old woman with BMI 25.4  
296 kg/m<sup>2</sup> and HbA1c 33 mmol/mol, and a 27 year old man with BMI 26.0 kg/m<sup>2</sup> and HbA1c 39  
297 mmol/mol), procured within the Nordic Network for Clinical Islet Transplantation, were  
298 included in the study. Biopsies were formalin fixed and paraffin-embedded or frozen in liquid  
299 nitrogen and stored at -80°C.

### 300 *Bacteria*

301 All four strains used in an earlier study in this new model were included (6). They were  
302 isolated from patients with invasive infections at the Department of Clinical Microbiology,  
303 Uppsala University Hospital, Uppsala, Sweden, and chosen for their documented ability to  
304 translocate into pancreas and cause infections in this anatomic region (Flores et al., 2003,  
305 Negm et al., 2010, Schmid et al., 1999, Stelzmueller et al., 2007). The bacteria were grown  
306 overnight in brain heart infusion (BHI) broth (Becton Dickinson) or Trypticase soy broth  
307 BBL with 10% inactivated horse serum and 5% Fildes enrichment BBL at 35°C to a  
308 concentration of 10<sup>9</sup> CFU/mL. After heat-inactivation by boiling for 15 min, the viability was  
309 controlled. The dead bacteria were stored at -70°C until used.

### 310 *Animals and Operating Procedure*

311 Healthy, male Wistar rats weighing 250 to 300 g (Taconic, Denmark) were used. Before the  
312 bacterial challenge, the animals were kept under standard laboratory conditions in accordance  
313 with the National Institute of Health principles of laboratory animal care and national laws in

314 Sweden. The rats were housed two by two in plastic cages under a 12:12-h light-dark cycle,  
315 and they were given water and food *ad libitum*. At challenge, 200  $\mu$ l of BHI broth with or  
316 without bacteria was instilled as previously described (Korsgren et al., 2012). Animals were  
317 subsequently kept under normal conditions for 4 h, 3 or 6 weeks, respectively. At the end of  
318 the experiment after 3 or 6 weeks, glucose tolerance was evaluated on some of the rats by an  
319 intravenous glucose tolerance test IVGTT under full anesthesia (thiobutabarbital sodium  
320 administered 10 minutes before glucose injection (100 mg/kg BW intraperitoneally). Bolus  
321 injection of glucose was given within 60 seconds via the tail vein. Blood glucose was  
322 measured immediately before and 5, 10, 30, 60, 90 and 120 minutes after glucose injection.  
323 Blood glucose was measured with a glucometer (CONTOUR<sup>®</sup>, Bayer, Solna, Sweden),  
324 operating within a range of 0.6- 33.3 mmol glucose/L.

325 Animals were subsequently killed by heart puncture and serum, plasma and pancreas were  
326 collected. The head and tail of the pancreas were fixed in 4% paraformaldehyde and prepared  
327 for paraffin embedding.

#### 328 *RNA Extraction and qPCR Array*

329 Frozen tissue biopsies from three different parts of the pancreatic body and tail from the organ  
330 donor with recent onset T1D and one biopsy from each of the two non-diabetic organ donors  
331 were subjected to sectioning and RNA extraction. Twenty consecutive 10  $\mu$ m sections were  
332 placed on glass slides for subsequent IHC (sections 1-2, 7-8, 13-14, & 19-20) or placed in 600  
333  $\mu$ l buffer RLT (Qiagen) containing 1% 2-mercaptoethanol (Sigma-Aldrich) for extraction of  
334 RNA. From each of the five tissue biopsies, sections 3-6, 9-12, and 15-18 were pooled and  
335 RNA extracted separately. Frozen tissue from the head and the tail of the pancreas of four rats  
336 sacrificed 4 h after the instillation of *Enterococcus faecalis* in the ductal system were  
337 subjected to sectioning and RNA extraction following the same protocol as for the human  
338 samples.

339 AllPrep Mini kit (Qiagen) was used for RNA extraction according to the manufacturer's  
340 instructions, including homogenization using QiaShredder columns (Qiagen) and on-column  
341 DNase digestion. In the final step, an elution volume of 30  $\mu$ L was used, giving RNA  
342 concentrations ranging from 63 to 217 ng/  $\mu$ L per sample.

343 Pathway-specific primer mixes (Rat Antibacterial Response, PBR-148Z, and Human  
344 Antibacterial Response, PBH-148Z; Qiagen) were used for preamplification and qPCR arrays  
345 (Rat Antibacterial Response, PARN-148ZE, and Human Antibacterial Response, PAHS-  
346 148ZC; Qiagen) were used for the expression analysis of 84 genes involved in innate

347 antibacterial responses in human and rat respectively. Genes with a quantification cycle (Cq)  
348 value >35 were regarded as non-detected and assigned a Cq of 35 to calculate fold induction.

#### 349 *Immunohistochemistry*

350 Formalin-fixed and paraffin-embedded pancreas biopsies were cut into 6  $\mu\text{m}$  consecutive  
351 sections and processed for immunohistochemistry for paraffin sections, as previously  
352 described (Korsgren et al., 2012). In brief, antigens were unmasked by heat-induced antigen  
353 retrieval, using buffer sodium citrate or EDTA according to the manufacturers'  
354 recommendations. Synaptophysin and CD45 or insulin and CD3 double-staining was used for  
355 screening for insulinitis within the human pancreases. Insulin and CD43 double-staining was  
356 used for screening for insulinitis within the rat pancreases. Consecutive sections were further  
357 stained for CD3, CD4, CD8, CD20, CD68, CD103, insulin and glucagon (table 1). Bound  
358 antibodies were visualized using Dako EnVision and diaminobenzidine-based substrate or  
359 double stained using EnVision G/2 Double Stain System, Rabbit/Mouse (DAB+/Permanent  
360 Red). Sections were counterstained with hematoxylin and analysed by light microscopy  
361 Leica. Rat spleen sections were used as positive control for all antibodies. Negative controls  
362 had the primary antibody replaced by buffer.

#### 363 *Statistical Analyses*

364 Data from the IVGTT are presented as means  $\pm$  SEM. The statistical significance of the  
365 differences between groups was analyzed by the Kruskal-Wallis test followed by Dunn's test  
366 for multiple comparisons. PCR array data were analyzed with non-parametric testing using  
367 Qlucore Omics Explorer version 3.3 software with an interface to R (Qlucore, Lund,  
368 Sweden). FDR was determined using the Benjamini Hochberg procedure.

369 **Acknowledgement.** The authors are grateful to Karin Fonnaland for excellent technical assistance.  
370 Acknowledgement. The study was supported by grants from the Swedish Medical Research Council  
371 (2019-01415), Novo Nordisk Foundation, the Ernfors Family Fund, Barndiabetesfonden,  
372 Diabetesfonden, the Sten A Olssons Foundation.

373

#### 374 **Author Contributions**

375 A.T., S.I., Å.M., O.S. and O.K designed, analyzed and interpreted the study and wrote the  
376 manuscript. O.K. is the guarantors of this work and, as such, had full access to all the data in  
377 the study and takes responsibility for the integrity of the data and the accuracy of the data  
378 analysis.

379

#### 380 **Disclosures**

381 The authors have nothing to disclose.

382

383 **Sources of support:** This study was supported by grants from the Swedish Medical Research  
384 Council, Novo Nordisk Foundation, the Ernfors Family Fund, Barndiabetes Fonden, the  
385 Swedish Diabetes Association. Human pancreatic islets were obtained from The Nordic  
386 network for Clinical islet Transplantation, supported by the Swedish national strategic  
387 research initiative EXODIAB (Excellence Of Diabetes Research in Sweden) and the Juvenile  
388 Diabetes Research Foundation.

## 389 References

- 390 ABDELLATIF, A. M., JENSEN SMITH, H., HARMS, R. Z. & SARVETNICK, N. E. 2019. Human Islet  
391 Response to Selected Type 1 Diabetes-Associated Bacteria: A Transcriptome-Based  
392 Study. *Front Immunol*, 10, 2623.
- 393 ALANENTALO, T., HORNBLAD, A., MAYANS, S., KARIN NILSSON, A., SHARPE, J., LAREFALK, A.,  
394 AHLGREN, U. & HOLMBERG, D. 2010. Quantification and three-dimensional imaging  
395 of the insulinitis-induced destruction of beta-cells in murine type 1 diabetes. *Diabetes*,  
396 59, 1756-64.
- 397 BROCKENBROUGH, J. S., WEIR, G. C. & BONNER-WEIR, S. 1988. Discordance of exocrine and  
398 endocrine growth after 90% pancreatectomy in rats. *Diabetes*, 37, 232-6.
- 399 BUTLER, A. E., JANSON, J., BONNER-WEIR, S., RITZEL, R., RIZZA, R. A. & BUTLER, P. C. 2003.  
400 Beta-cell deficit and increased beta-cell apoptosis in humans with type 2 diabetes.  
401 *Diabetes*, 52, 102-10.
- 402 CAMPBELL-THOMPSON, M., FU, A., KADDIS, J. S., WASSERFALL, C., SCHATZ, D. A., PUGLIESE,  
403 A. & ATKINSON, M. A. 2016a. Insulinitis and beta-Cell Mass in the Natural History of  
404 Type 1 Diabetes. *Diabetes*, 65, 719-31.
- 405 CAMPBELL-THOMPSON, M., WASSERFALL, C., MONTGOMERY, E., ATKINSON, M. & KADDIS, J.  
406 2012. Pancreas Organ Weight in Individuals With Disease-Associated Autoantibodies  
407 at Risk for Type 1 Diabetes. *JAMA*, 308, 2337-2339.
- 408 CAMPBELL-THOMPSON, M. L., ATKINSON, M. A., BUTLER, A. E., CHAPMAN, N. M., FRISK, G.,  
409 GIANANI, R., GIEPMANS, B. N., VON HERRATH, M. G., HYOTY, H., KAY, T. W.,  
410 KORSGREN, O., MORGAN, N. G., POWERS, A. C., PUGLIESE, A., RICHARDSON, S. J.,  
411 ROWE, P. A., TRACY, S. & IN'T VELD, P. A. 2013. The diagnosis of insulinitis in human  
412 type 1 diabetes. *Diabetologia*, 56, 2541-3.
- 413 CAMPBELL-THOMPSON, M. L., KADDIS, J. S., WASSERFALL, C., HALLER, M. J., PUGLIESE, A.,  
414 SCHATZ, D. A., SHUSTER, J. J. & ATKINSON, M. A. 2016b. The influence of type 1  
415 diabetes on pancreatic weight. *Diabetologia*, 59, 217-21.
- 416 CHEUK, S., WIKEN, M., BLOMQVIST, L., NYLEN, S., TALME, T., STAHL, M. & EIDSMO, L. 2014.  
417 Epidermal Th22 and Tc17 cells form a localized disease memory in clinically healed  
418 psoriasis. *J Immunol*, 192, 3111-20.
- 419 CLARK, R. A. 2015. Resident memory T cells in human health and disease. *Sci Transl Med*, 7,  
420 269rv1.
- 421 CREUTZFELDT, W., GLEICHMANN, D., OTTO, J., STOCKMANN, F., MAISONNEUVE, P. &  
422 LANKISCH, P. G. 2005. Follow-up of exocrine pancreatic function in type-1 diabetes  
423 mellitus. *Digestion*, 72, 71-5.
- 424 DAMOND, N., ENGLER, S., ZANOTELLI, V. R. T., SCHAPIRO, D., WASSERFALL, C. H.,  
425 KUSMARTSEVA, I., NICK, H. S., THOREL, F., HERRERA, P. L., ATKINSON, M. A. &  
426 BODENMILLER, B. 2019. A Map of Human Type 1 Diabetes Progression by Imaging  
427 Mass Cytometry. *Cell Metab*, 29, 755-768 e5.
- 428 EIZIRIK, D. L., SAMMETH, M., BOUCKENOOGHE, T., BOTTU, G., SISINO, G., IGOILLO-ESTEVE,  
429 M., ORTIS, F., SANTIN, I., COLLI, M. L., BARTHSON, J., BOUWENS, L., HUGHES, L.,  
430 GREGORY, L., LUNTER, G., MARSELLI, L., MARCHETTI, P., MCCARTHY, M. I. & CNOP,  
431 M. 2012. The human pancreatic islet transcriptome: expression of candidate genes  
432 for type 1 diabetes and the impact of pro-inflammatory cytokines. *PLoS Genet*, 8,  
433 e1002552.



- 434 FLORES, C., MAGUILNIK, I., HADLICH, E. & GOLDANI, L. Z. 2003. Microbiology of choledochal  
435 bile in patients with choledocholithiasis admitted to a tertiary hospital. *J*  
436 *Gastroenterol Hepatol*, 18, 333-6.
- 437 FOULIS, A. K., LIDDLE, C. N., FARQUHARSON, M. A., RICHMOND, J. A. & WEIR, R. S. 1986. The  
438 histopathology of the pancreas in type 1 (insulin-dependent) diabetes mellitus: a 25-  
439 year review of deaths in patients under 20 years of age in the United Kingdom.  
440 *Diabetologia*, 29, 267-74.
- 441 GAGLIA, J. L., GUIMARAES, A. R., HARISINGHANI, M., TURVEY, S. E., JACKSON, R., BENOIST,  
442 C., MATHIS, D. & WEISSLEDER, R. 2011. Noninvasive imaging of pancreatic islet  
443 inflammation in type 1A diabetes patients. *J Clin Invest*, 121, 442-5.
- 444 GEPTS, W. 1965. Pathologic anatomy of the pancreas in juvenile diabetes mellitus. *Diabetes*,  
445 14, 619-33.
- 446 HARDT, P. D., EWALD, N., BROCKLING, K., TANAKA, S., ENDO, T., KLOER, H. U., BRETZEL, R.  
447 G., JAEGER, C., SHIMURA, H. & KOBAYASHI, T. 2008. Distinct autoantibodies against  
448 exocrine pancreatic antigens in European patients with type 1 diabetes mellitus and  
449 non-alcoholic chronic pancreatitis. *JOP : Journal of the pancreas*, 9, 683-9.
- 450 IN'T VELD, P. 2014. Insulitis in human type 1 diabetes: a comparison between patients and  
451 animal models. *Semin Immunopathol*, 36, 569-79.
- 452 JOHANSSON, U., OLSSON, A., GABRIELSSON, S., NILSSON, B. & KORSGREN, O. 2003.  
453 Inflammatory mediators expressed in human islets of Langerhans: implications for  
454 islet transplantation. *Biochem Biophys Res Commun*, 308, 474-9.
- 455 KNIP, M. & SILJANDER, H. 2016. The role of the intestinal microbiota in type 1 diabetes  
456 mellitus. *Nat Rev Endocrinol*, 12, 154-67.
- 457 KORPOS, E., KADRI, N., LOISMANN, S., FINDEISEN, C. R., ARFUSO, F., BURKE, G. W., 3RD,  
458 RICHARDSON, S. J., MORGAN, N. G., BOGDANI, M., PUGLIESE, A. & SOROKIN, L. 2021.  
459 Identification and characterisation of tertiary lymphoid organs in human type 1  
460 diabetes. *Diabetologia*.
- 461 KORSGREN, S., MOLIN, Y., SALMELA, K., LUNDGREN, T., MELHUS, A. & KORSGREN, O. 2012.  
462 On the etiology of type 1 diabetes: a new animal model signifying a decisive role for  
463 bacteria eliciting an adverse innate immunity response. *The American journal of*  
464 *pathology*, 181, 1735-48.
- 465 KOTB, M., NORRBY-TEGLUND, A., MCGEER, A., EL-SHERBINI, H., DORAK, M. T., KHURSHID, A.,  
466 GREEN, K., PEEPLES, J., WADE, J., THOMSON, G., SCHWARTZ, B. & LOW, D. E. 2002.  
467 An immunogenetic and molecular basis for differences in outcomes of invasive group  
468 A streptococcal infections. *Nat Med*, 8, 1398-404.
- 469 KROGVOLD, L., WIBERG, A., EDWIN, B., BUANES, T., JAHNSEN, F. L., HANSSSEN, K. F.,  
470 LARSSON, E., KORSGREN, O., SKOG, O. & DAHL-JORGENSEN, K. 2016. Insulitis and  
471 characterisation of infiltrating T cells in surgical pancreatic tail resections from  
472 patients at onset of type 1 diabetes. *Diabetologia*, 59, 492-501.
- 473 KURIC, E., SEIRON, P., KROGVOLD, L., EDWIN, B., BUANES, T., HANSSSEN, K., SKOG, O., DAHL-  
474 JØRGENSEN, K. & KORSGREN, O. 2017. Demonstration of Tissue Resident Memory  
475 CD8 T Cells in Insulitic Lesions in Adult Patients with Recent-Onset Type 1 Diabetes.  
476 *Am J Pathol*, 187, 581-588.
- 477 MEIER, J. J., BHUSHAN, A., BUTLER, A. E., RIZZA, R. A. & BUTLER, P. C. 2005. Sustained beta  
478 cell apoptosis in patients with long-standing type 1 diabetes: indirect evidence for  
479 islet regeneration? *Diabetologia*, 48, 2221-8.

- 480 NEGM, A. A., SCHOTT, A., VONBERG, R. P., WEISMUELLER, T. J., SCHNEIDER, A. S., KUBICKA,  
481 S., STRASSBURG, C. P., MANNS, M. P., SUERBAUM, S., WEDEMEYER, J. & LANKISCH, T.  
482 O. 2010. Routine bile collection for microbiological analysis during cholangiography  
483 and its impact on the management of cholangitis. *Gastrointest Endosc*, 72, 284-91.
- 484 PANICOT, L., MAS, E., THIVOLET, C. & LOMBARDO, D. 1999. Circulating antibodies against an  
485 exocrine pancreatic enzyme in type 1 diabetes. *Diabetes*, 48, 2316-23.
- 486 POUND, P. 2020. Are Animal Models Needed to Discover, Develop and Test Pharmaceutical  
487 Drugs for Humans in the 21st Century? *Animals (Basel)*, 10, 2455-2461.
- 488 REDDY, S., ZENG, N., AL-DIERY, H., JUNG, D., YEU, C., JORET, M. O., MERRILEES, M. J. & WU,  
489 F. 2015. Analysis of peri-islet CD45-positive leucocytic infiltrates in long-standing type  
490 1 diabetic patients. *Diabetologia*, 58, 1024-35.
- 491 ROEP, B. O. & ATKINSON, M. 2004. Animal models have little to teach us about type 1  
492 diabetes: 1. In support of this proposal. *Diabetologia*, 47, 1650-6.
- 493 ROUXEL, O., DA SILVA, J., BEAUDOIN, L., NEL, I., TARD, C., CAGNINACCI, L., KIAF, B., OSHIMA,  
494 M., DIEDISHEIM, M., SALOU, M., CORBETT, A., ROSSJOHN, J., MCCLUSKEY, J.,  
495 SCHARFMANN, R., BATTAGLIA, M., POLAK, M., LANTZ, O., BELTRAND, J. & LEHUEN, A.  
496 2017. Cytotoxic and regulatory roles of mucosal-associated invariant T cells in type 1  
497 diabetes. *Nat Immunol*, 18, 1321-1331.
- 498 SCHMID, S. W., UHL, W., FRIESS, H., MALFERTHEINER, P. & BUCHLER, M. W. 1999. The role of  
499 infection in acute pancreatitis. *Gut*, 45, 311-6.
- 500 SKOG, O. & KORSGREN, O. 2020. On the dynamics of the human endocrine pancreas and  
501 potential consequences for the development of type 1 diabetes. *Acta Diabetol*, 57,  
502 503-511.
- 503 SKOG, O., KORSGREN, S., MELHUS, A. & KORSGREN, O. 2013. Revisiting the notion of type 1  
504 diabetes being a T-cell-mediated autoimmune disease. *Curr Opin Endocrinol Diabetes*  
505 *Obes*, 20, 118-23.
- 506 SMEETS, S., STAELS, W., STANGE, G., GILLARD, P., DE LEU, N. & IN'T VELD, P. 2021. Insulinitis  
507 and lymphoid structures in the islets of Langerhans of a 66-year-old patient with  
508 long-standing type 1 diabetes. *Virchows Arch*, 478, 1209-1214.
- 509 STELZMUELLER, I., BERGER, N., WIESMAYR, S., ELLER, M., TABARELLI, W., FILLE, M.,  
510 MARGREITER, R. & BONATTI, H. 2007. Group milleri streptococci: significant  
511 pathogens in solid organ recipients. *Transpl Int*, 20, 51-6.
- 512 TANIGUCHI, T., OKAZAKI, K., OKAMOTO, M., SEKO, S., TANAKA, J., UCHIDA, K., NAGASHIMA,  
513 K., KUROSE, T., YAMADA, Y., CHIBA, T. & SEINO, Y. 2003. High prevalence of  
514 autoantibodies against carbonic anhydrase II and lactoferrin in type 1 diabetes:  
515 concept of autoimmune exocrinopathy and endocrinopathy of the pancreas.  
516 *Pancreas*, 27, 26-30.
- 517 TANIGUCHI, T., TANAKA, J., SEKO, S., OKAZAKI, K. & OKAMOTO, M. 2001. Association of  
518 rapid-onset type 1 diabetes and clinical acute pancreatitis positive for autoantibodies  
519 to the exocrine pancreas. *Diabetes Care*, 24, 2156-7.
- 520 WAEBER, G., CALANDRA, T., RODUIT, R., HAEFLIGER, J. A., BONNY, C., THOMPSON, N.,  
521 THORENS, B., TEMPLER, E., MEINHARDT, A., BACHER, M., METZ, C. N., NICOD, P. &  
522 BUCALA, R. 1997. Insulin secretion is regulated by the glucose-dependent production  
523 of islet beta cell macrophage migration inhibitory factor. *Proc Natl Acad Sci U S A*, 94,  
524 4782-7.
- 525 WILLCOX, A., RICHARDSON, S. J., BONE, A. J., FOULIS, A. K. & MORGAN, N. G. 2009. Analysis  
526 of islet inflammation in human type 1 diabetes. *Clin Exp Immunol*, 155, 173-81.

- 527 WILLIAMS, A. J., CHAU, W., CALLAWAY, M. P. & DAYAN, C. M. 2007. Magnetic resonance  
528 imaging: a reliable method for measuring pancreatic volume in Type 1 diabetes.  
529 *Diabet Med*, 24, 35-40.
- 530 WILLIAMS, A. J., THROWER, S. L., SEQUEIROS, I. M., WARD, A., BICKERTON, A. S., TRIAY, J. M.,  
531 CALLAWAY, M. P. & DAYAN, C. M. 2012. Pancreatic volume is reduced in adult  
532 patients with recently diagnosed type 1 diabetes. *J Clin Endocrinol Metab*, 97, E2109-  
533 13.  
534

535 **Figure legends**

536 **Figure 1.** Intravenous glucose tolerance test revealed no significant differences in peak  
537 glucose values and subsequent glucose disposal 3 weeks **(A)** or 6 weeks **(B)** after bacterial  
538 challenge with *S. aureus* and *E. faecalis* (filled squares) or *E. coli* and  $\alpha$ -hemolytic  
539 streptococcus (filled triangles) when compared with rats instilled with brain heart infusion  
540 broth alone (filled circles;  $p>0.05$ ).

541  
542 **Figure 2. A)** Expression of 84 human genes related to innate antibacterial response was  
543 analyzed with a qPCR array. Pancreatic RNA extracted from an organ donor that died at acute  
544 onset of T1D showed a  $>2$ -fold overexpression of 18 antibacterial genes compared to non-  
545 diabetic donors (ND1 & ND2) ( $P<0.05$ ,  $fdr<10\%$ ). **(B)** Expression of 84 rat genes related to  
546 innate antibacterial response were analyzed with a qPCR array. RNA was extracted from  
547 pancreatic rat tissue with (bact+) or without (bact-) instilled bacteria. Bacterial translocation  
548 induced a  $>2$ -fold overexpression of 22 genes and under expression of one gene (*ccl5/rantes*)  
549 related to antibacterial response ( $P<0.05$ ,  $fdr<10\%$ ). Eight of these were homologues to genes  
550 that were significantly induced by bacterial translocation in the human tissue samples.

551  
552 **Figure 3.** Pancreatic tissue from a 29-year old organ donor who died at onset of type 1  
553 diabetes **(A)** or from rats three weeks after installation of *E. faecalis* in the pancreatic duct **(B-**  
554 **L)** stained for islet hormones and immune cell markers. **A)** An islet with insulinitis; CD45  
555 brown, synaptophysin red. **B)** focal area of dense accumulation of immune cells resembling  
556 the organization of lymphatic tissue; CD4 brown, CD8 red. **C-L)** Islets with varying degrees  
557 of insulinitis; **C)** insulin red, CD43 brown. **D)** glucagon red, CD43 brown. **E-F)** CD3 brown, **G)**  
558 CD20 brown. **H)** CD68 brown. **I-J)** CD4 brown, CD8 red. **K-L)** CD103 brown. Scale bars  
559 represents 100  $\mu\text{m}$ .

560 **Table 1. Detailed list of antibodies used.**

| <b>Name</b>       | <b>Clone and supplier</b> | <b>HIER pH</b> | <b>Dilution</b> |
|-------------------|---------------------------|----------------|-----------------|
| anti-CD3 (rat)    | SP7 (Abcam)               | 6.0            | 1:100           |
| anti-CD4 (rat)    | CAL4 (Abcam)              | 9.0            | 1:4000          |
| anti-CD8 (rat)    | OX-8 (Abcam)              | 6.0            | 1:1000          |
| anti-CD20 (rat)   | SP32 (Abcam)              | 6.0            | 1:100           |
| anti-CD43 (rat)   | AbD (BioRad)              | 6.0            | 1:200           |
| anti-CD68 (rat)   | ED1 (Biorad)              |                | 1:100           |
| anti-CD103 (rat)  | ERP2259027 (Abcam)        | 9.0            | 1:1000          |
| anti-Insulin      | A0564 (Agilent))          |                | 1:200           |
| anti-Glucagon     | LS C312053 (LSBIO)        | 6.0            | 1:400           |
| anti-CD45 (human) | 2B11+PD7/26 (Agilent)     | 9.0            | 1:75            |
| anti-Synaptohisin | DAK-SYNAP (Agilent)       | 9.0            | 1:100           |
| anti-CD3          | Polyclonal (Agilent)      | 9.0            | 1:100           |

561

Figure 1

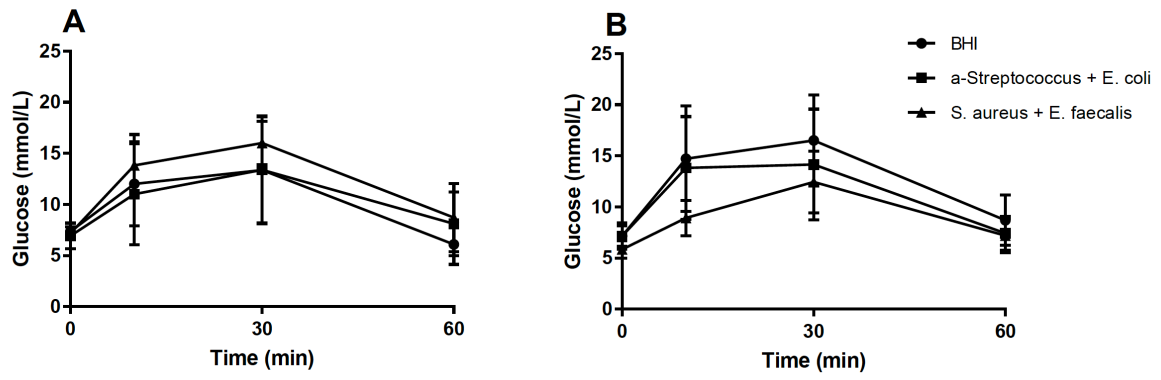

Figure 2

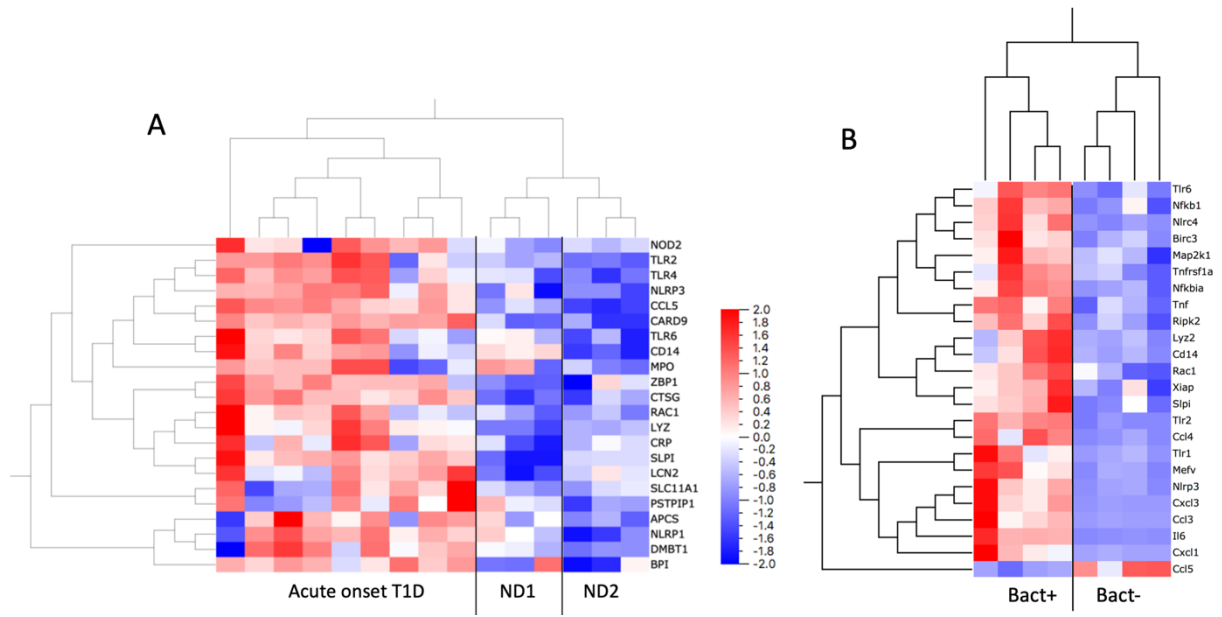

Figure 3

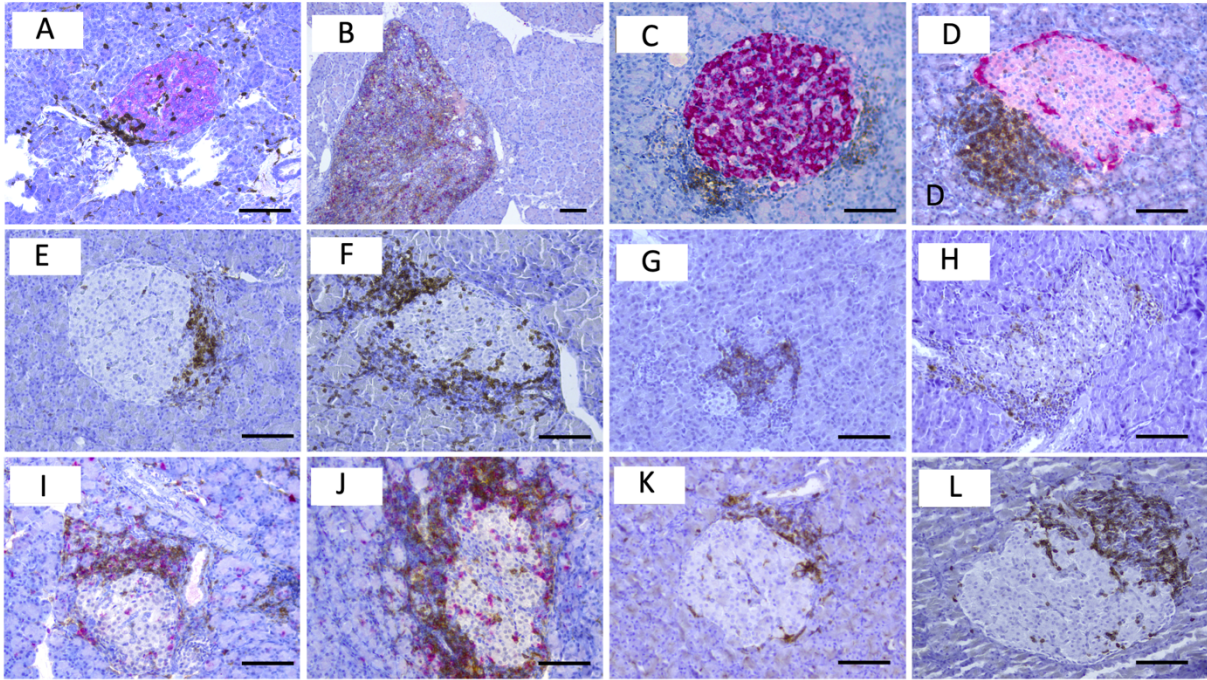

Source: https://www.biorxiv.org/content/10.1101/2021.12.10.472088v1.full.pdf
